# Supplementary material for: Tripartite Motif 22 (TRIM22) protein restricts herpes simplex virus 1 by epigenetic silencing of viral immediate-early genes
Source: PubMed Central journal article supplement (PMC7877759; doi:10.1371/journal.ppat.1009281), 2021-02-01
Supplement: ppat.1009281.s008.pdf [file ppat.1009281.s008.pdf]

**S1 Table: List of primer sequences used in the study.**

| Gene         | Purpose | Forward primer                          | Reverse primer                        |
|--------------|---------|-----------------------------------------|---------------------------------------|
| <i>ICP4</i>  | qRT-PCR | 5'GCGTCGTCGAGGTCGT-3'                   | 5'-CGCGGAGACGGAGGAG-3'                |
| <i>ICP8</i>  | qRT-PCR | 5'-<br>GGAGGTGCACCGGATACC-<br>3'        | 5'-<br>GGCTAAAATCCGGCATGAAC-<br>3'    |
| <i>ICP27</i> | qRT-PCR | 5'-<br>GCATCCTTCGTGTTTGTCA<br>TT-3'     | 5'-GCATCTTCTCTCC<br>GACCCCG-3'        |
| <i>UL5</i>   | qRT-PCR | 5'-<br>AAGACGTTACCAAGCTGC<br>T-3'       | 5'-<br>CAGATCCACGCCCTTGATGA-<br>3'    |
| <i>UL8</i>   | qRT-PCR | 5' - GGT GAT GAG CGC<br>AGT CC – 3'     | 5' - GTC GTG CGT GTC TGT<br>CC – 3'   |
| <i>UL9</i>   | qRT-PCR | 5' -<br>CGACGATACCCTGACCCCA<br>AAG – 3' | 5' -<br>CGAAAAGACCCACCTCCTCCG<br>– 3' |
| <i>UL30</i>  | qRT-PCR | 5'-<br>CCCAAGGTGTACTGCGGG-<br>3'        | 5'-<br>CTCCACGTTCTCCAGGATGT-<br>3'    |

|                                 |         |                                           |                                           |
|---------------------------------|---------|-------------------------------------------|-------------------------------------------|
| <i>UL42</i>                     | qRT-PCR | 5' - ACGTCCGACGGCGAGG<br>- 3'             | 5' - CAGGCGCAACTGAACGTC<br>- 3'           |
| <i>UL52</i>                     | qRT-PCR | 5' -<br>GCCCTCCTCACAAACTCTC<br>TACTG - 3' | 5' -<br>CCGTCCCCAATAAACAAAAGG<br>- 3'     |
| <i>gC</i>                       | qRT-PCR | 5' -<br>CCCCCGCGGACCTTCACC<br>T - 3'      | 5' - GGCCGCGGCAGCACCAG -<br>3'            |
| <i>h18S</i><br><i>RNA</i>       | qRT-PCR | 5'-<br>GCATTCGTATTGCGCCGCT<br>A-3'        | 5'-AGCTGCCCGGCGGGT-3'                     |
| <i>TRIM22</i><br><i>RNA</i>     | qRT-PCR | 5'-<br>AGCTCGTTTAGTGAACCGT<br>CAGATC-3'   | 5'-<br>ACCTACAGGTGGGGTCTTTCA<br>TTCCC -3' |
| <i>ICP8</i><br><i>promoter</i>  | qPCR    | 5'-<br>GCCCGGGCGCTGCTTGTT<br>CTCC-3'      | 5'-<br>CGTCCGCCGTCGCAGCCGTA<br>TC-3'      |
| <i>ICP27</i><br><i>promoter</i> | qPCR    | 5'-<br>CCGCCGGCCTGGATGTGA<br>CG-3'        | 5'-<br>CGTGGTGGCCGGGGTGGTGC<br>TC-3       |
| <i>ICP4</i><br><i>promoter</i>  | qPCR    | 5'-<br>GCCGTCGACGCGGAACT-3'               | 5'-<br>CCTTTTTCCCAACCAAGCAT-3'            |

|                |      |                    |                       |
|----------------|------|--------------------|-----------------------|
| <i>GAPDH</i>   | qPCR | 5'-                | 5'-                   |
| <i>pseudog</i> |      | CAGGCGCCCAATACGACC | TTCGACAGTCAGTCAGCCGCA |
| <i>ene</i>     |      | AAAATC-3'          | TCTTCTT-3'            |
